# Supplementary material for: Dual color fluorescence in situ hybridization (FISH) assays for detecting Mycobacterium tuberculosis and Mycobacterium avium complexes and related pathogens in cultures
Source: PubMed Central journal article supplement (PMC5388335; doi:10.1371/journal.pone.0174989), 2017-04-11

## S1Fig. Workflow Chart for the FISH Assays

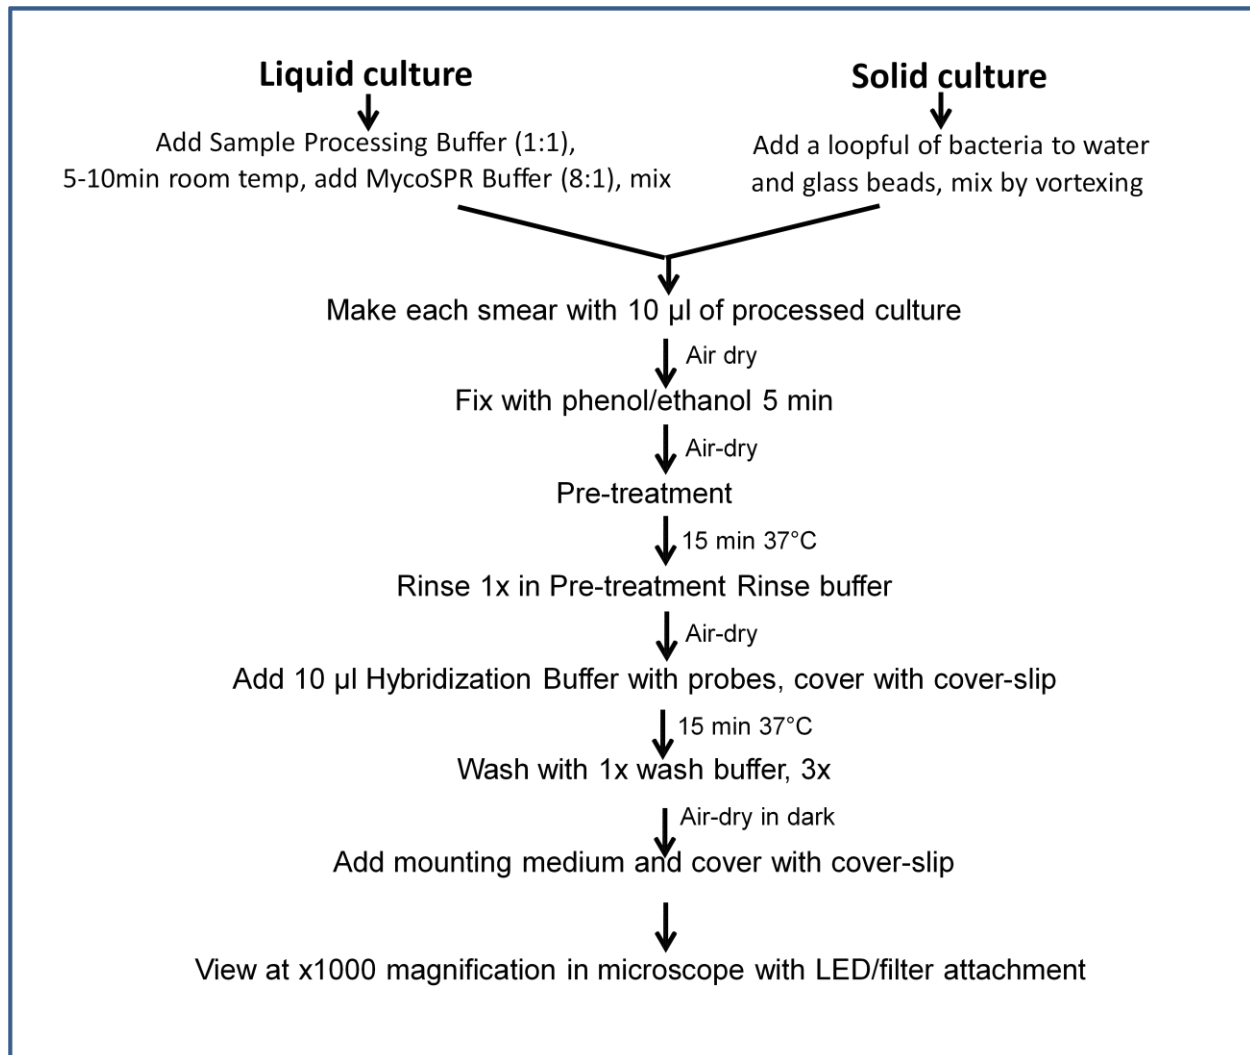

Supplement: pone.0174989.s001.pdf [file pone.0174989.s001.pdf]
