# Supplementary material for: Dual color fluorescence in situ hybridization (FISH) assays for detecting Mycobacterium tuberculosis and Mycobacterium avium complexes and related pathogens in cultures
Source: PubMed Central journal article supplement (PMC5388335; doi:10.1371/journal.pone.0174989), 2017-04-11
Supplement: pone.0174989.s002.pdf [file pone.0174989.s002.pdf]

**S2 Fig. Microscope with LED and Filter Attachment**

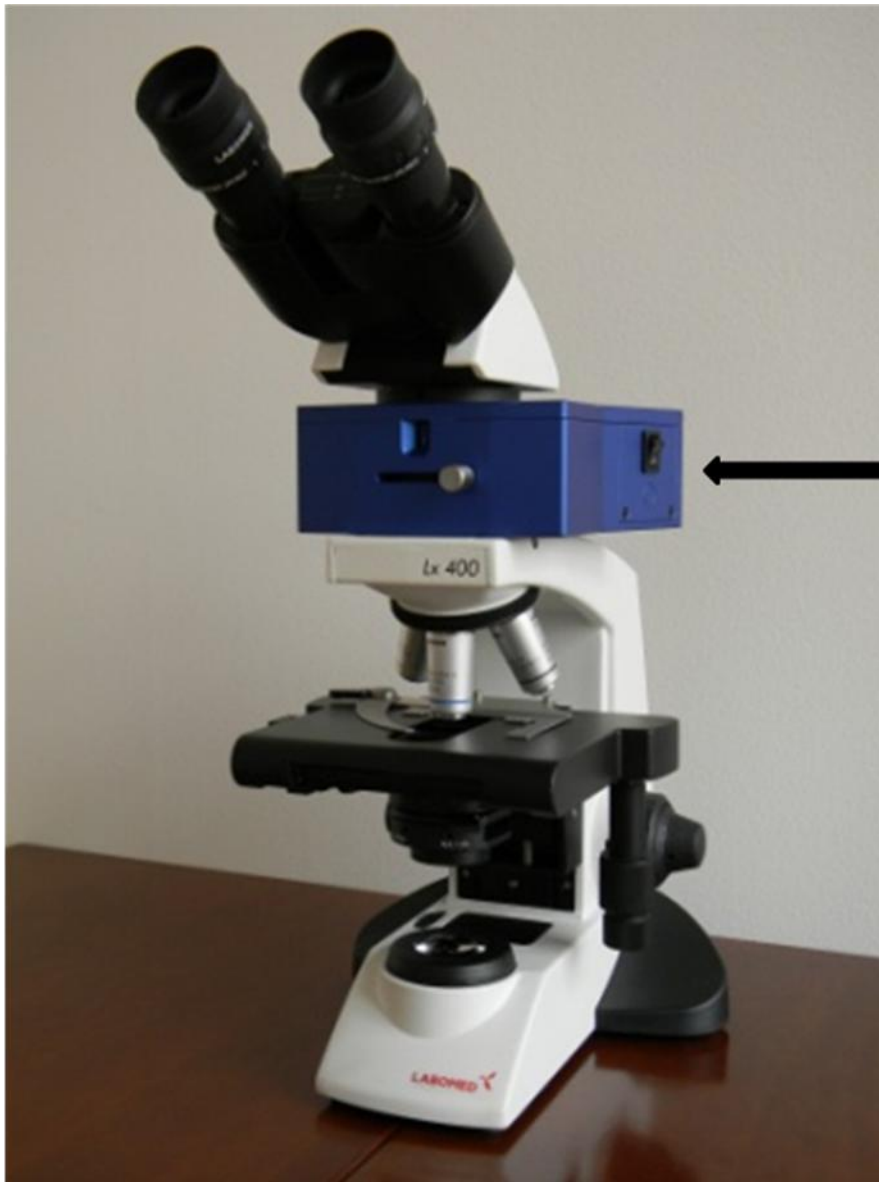

LED and Filter Attachment
