# Supplementary material for: Dual color fluorescence in situ hybridization (FISH) assays for detecting Mycobacterium tuberculosis and Mycobacterium avium complexes and related pathogens in cultures
Source: PubMed Central journal article supplement (PMC5388335; doi:10.1371/journal.pone.0174989), 2017-04-11
Supplement: pone.0174989.s004.pdf [file pone.0174989.s004.pdf]

**S2 Table. Estimates of Sensitivity, Specificity, Predictive Values, and Accuracy of the FISH Assays with Reference Pathogen Cultures**

| <b>MN Genus Probe</b> |     |          |     |             |                         |            |
|-----------------------|-----|----------|-----|-------------|-------------------------|------------|
|                       |     |          |     | (%)         | 95% Confidence Interval |            |
|                       |     | Expected |     | Sensitivity | 97.9                    | 87.3-99.9% |
|                       |     | (+)      | (-) | Specificity | 84.0                    | 63.1-94.7  |
| FISH                  | (+) | 46       | 4   | PPV         | 92.0                    | 79.9-97.4  |
|                       | (-) | 1        | 21  | NPV         | 95.5                    | 75.1-99.8  |

Accuracy 93.1%

| <b>MTBC Probe</b> |     |          |     |             |                         |           |
|-------------------|-----|----------|-----|-------------|-------------------------|-----------|
|                   |     |          |     | (%)         | 95% Confidence Interval |           |
|                   |     | Expected |     | Sensitivity | 100.0                   | 51.7-100% |
|                   |     | (+)      | (-) | Specificity | 100.0                   | 93.1-100  |
| FISH              | (+) | 6        | 0   | PPV         | 100.0                   | 51.7-100  |
|                   | (-) | 0        | 66  | NPV         | 100.0                   | 93.1-100  |

Accuracy 100%

| <b>MAC Probe</b> |     |          |     |             |                         |             |
|------------------|-----|----------|-----|-------------|-------------------------|-------------|
|                  |     |          |     | (%)         | 95% Confidence Interval |             |
|                  |     | Expected |     | Sensitivity | 100.0                   | 73.2 - 100% |
|                  |     | (+)      | (-) | Specificity | 100.0                   | 92.3 - 100  |
| FISH             | (+) | 14       | 0   | PPV         | 100.0                   | 73.2 - 100  |
|                  | (-) | 0        | 58  | NPV         | 100.0                   | 92.3 - 100  |

Accuracy 100%

PPV – Positive predictive value; NPV – Negative predictive value.
